# Supplementary material
Source: MDPI journal article supplement (https://www.mdpi.com/2073-4395/12/12/3007)

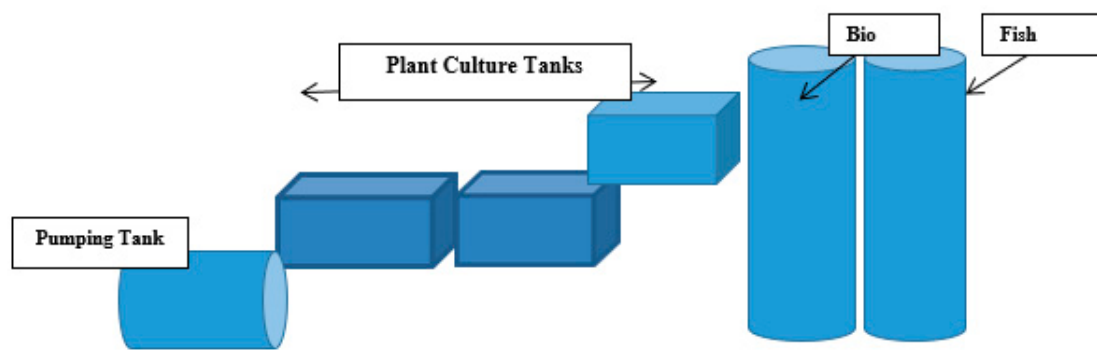

Figure S1. Experimental set up showing tanks, growth trays and filters.

Supplement: s1 [file s1]
